# Supplementary material
Source: Springer Nature journal article supplement (https://www.springermedizin.de/resource/supplementary/12875_2014_1091_MOESM5_ESM.pdf/9435804)

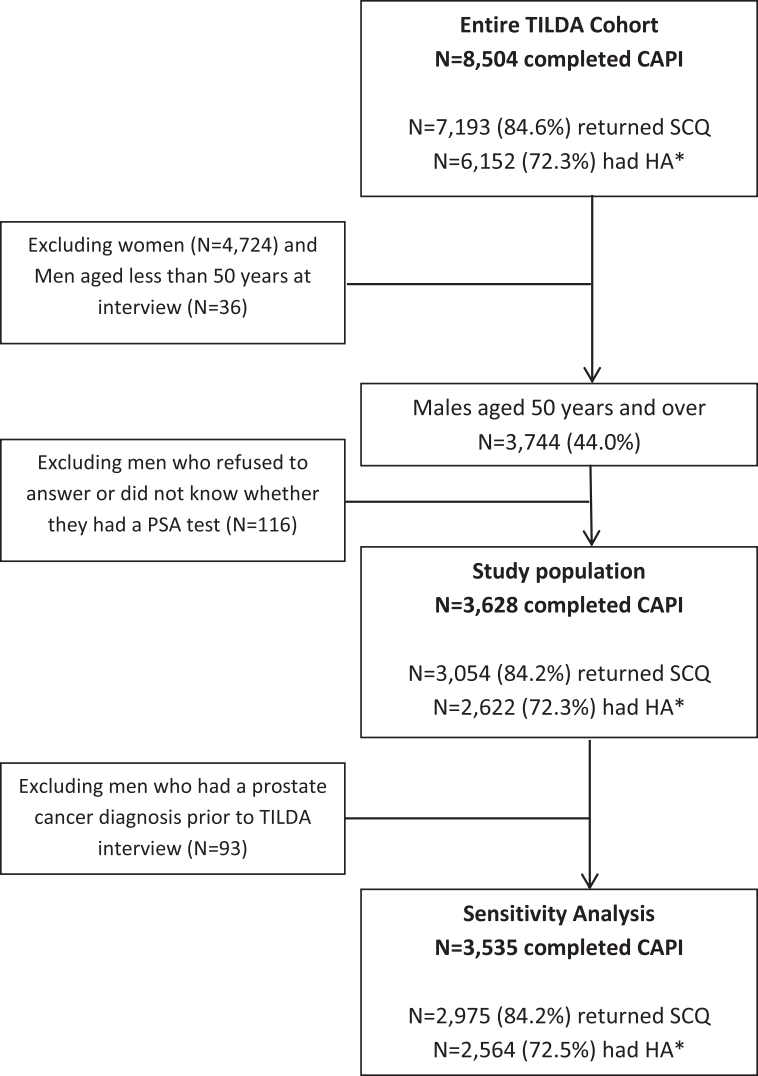

Supplement: MOESM5 [file 9435804]
